# Supplementary material for: Phase I Trial of <sup>99m</sup>Tc-1-Thio-D-glucose for Imaging of Lymphomas
Source: Preprints.org preprint supplement (doi:10.20944/preprints202205.0028.v1), 2022-05-05
Supplement: Supplementary file 1 [file supplementary]

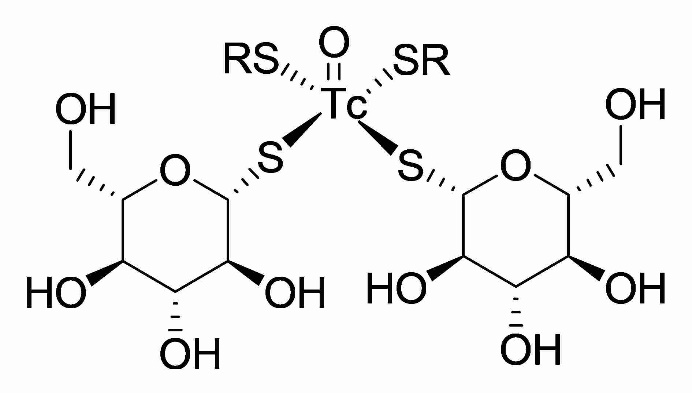


Figure S1**.** Structure of 99mTc-1-thio-D-glucose


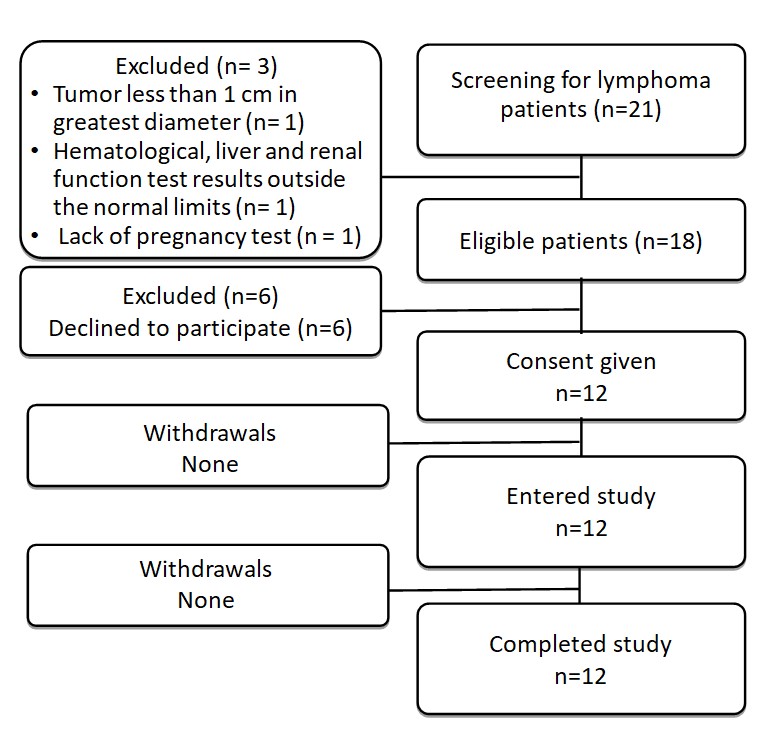


Figure S2.Standards for Reporting of Diagnostic Accuracy Studies (STARD) flow diagram.


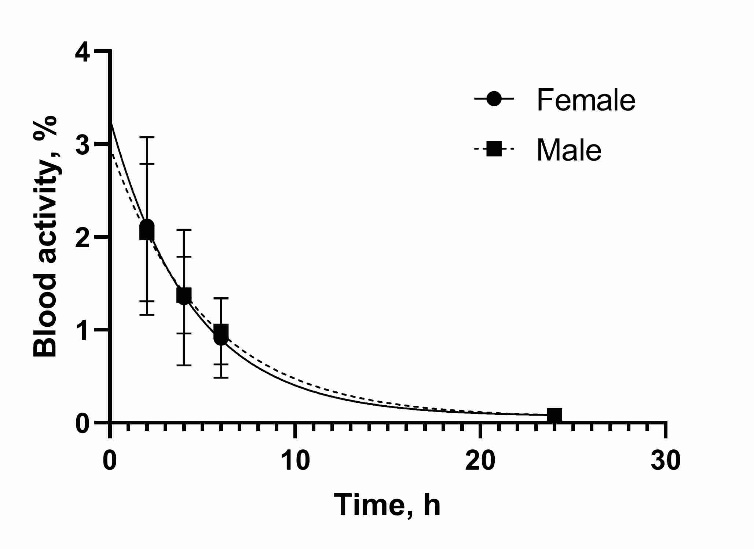


Figure S3.Kinetics of elimination of 99mTc-TG from blood. Data are based on count rates in regions of interest placed over hearts. %ID = percentage injected dose.
